# Supplementary material for: Enhanced water-resistant performance of Cu-BTC through polyvinylpyrrolidone protection and its capture ability evaluation of methylene blue
Source: Royal Society of Chemistry journal article supplement (doi:10.1039/d1nj05561e), 2022-01-01
Supplement: d1nj05561e1.pdf [file d1nj05561e1.pdf]

*Supporting information for*

## **Enhanced water-resistant performance of Cu-BTC through polyvinylpyrrolidone protection and its capture ability evaluation of methylene blue**

Yingzhi Zhu,<sup>a</sup> Danping Wu,<sup>a</sup> Jiehong Chen,<sup>b</sup> Na Ma,<sup>b</sup> and Wei Dai\*,<sup>a</sup>

<sup>a</sup>Key Laboratory of the Ministry of Education for Advanced Catalysis Materials, College of Chemistry and Life Science, Zhejiang Normal University, Jinhua 321004, People's Republic of China

<sup>b</sup>College of Geography and Environmental Sciences, Zhejiang Normal University, Jinhua, 321004, PR China

### **Section I:**

**Chemicals:** Copper nitrate trihydrate ( $\text{Cu}(\text{NO}_3)_2 \cdot 3\text{H}_2\text{O}$ ) (Shanghai Aladdin Biotechnology Co., Ltd.), Benzene-1,3,5-tricarboxylic acid ( $\text{H}_3\text{BTC}$ ) (Sinopharm Chemical Reagent Co., Ltd.), polyvinylpyrrolidone K30 ( $(\text{C}_6\text{H}_9\text{NO})_n$ ) (Sinopharm Chemical Reagent Co., Ltd.), absolute ethanol ( $\text{C}_2\text{H}_6\text{O}$ ) (Sinopharm Chemical Reagent Co., Ltd.), deionized water (generated at 25 °C,  $18.25\text{m}\Omega \cdot \text{cm}^{-1}$ ), sodium hydroxide ( $\text{NaOH}$ ) (Sinopharm Chemical Reagent Co., Ltd.), hydrochloric acid ( $\text{HCl}$ ) (Sinopharm Chemical Reagent Co., Ltd.), methylene blue (MB) (Sinopharm Chemical Reagent Co., Ltd.).

**Apparatus:** SEM images are scanned by electron microscope using Hitachi S4800 equipped with EDAX energy dispersion detector (Zeiss Gemini SEM 300). D8 Advance X-ray diffractometer of Bruck AXS GMBH is used to scan the crystal phase

of the material ( $2\theta = 5\sim 30^\circ$ ). The specific surface area and average pore diameter of the material are measured by Autosorb-iQ physical adsorption instrument of Kanta Instrument Co., Ltd. (The samples were degassed at  $120^\circ\text{C}$  for 5h and The  $\text{N}_2$  adsorption-desorption isotherms were recorded at  $-196^\circ\text{C}$ ). The average particle size of samples are measured by Mastersizer 3000E laser particle size analyzer from Malvern Instruments Co., Ltd. The thermal gravimetric analysis (TGA) was determined using a STA 449 F5 thermal gravimetric analyzer from 20 to  $850^\circ\text{C}$ . The functional groups were analyzed by a Fourier transform infrared spectrometer (FT-IR, Thermo Nicolet NEXUS-670). Sample absorbance was measured by Shimadzu UV-3600 spectrophotometer at 664nm.

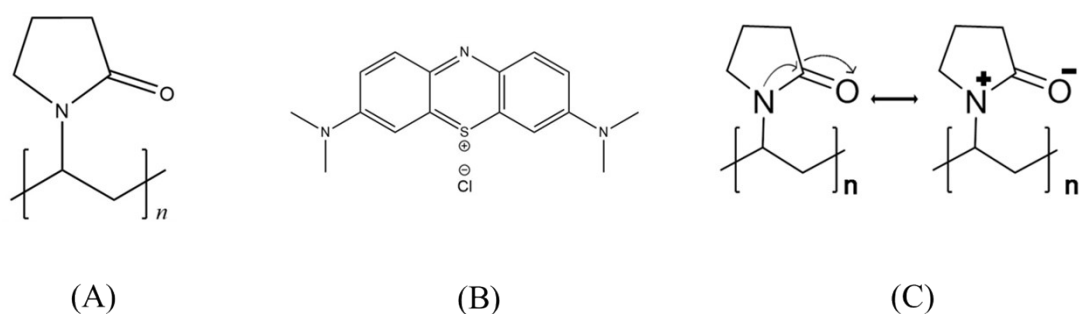

**Scheme S1.** Molecular formula of PVP and MB, and the resonance structure of PVP (A: Molecular formula of PVP; B: Molecular formula of MB; C: the resonance structure of PVP)

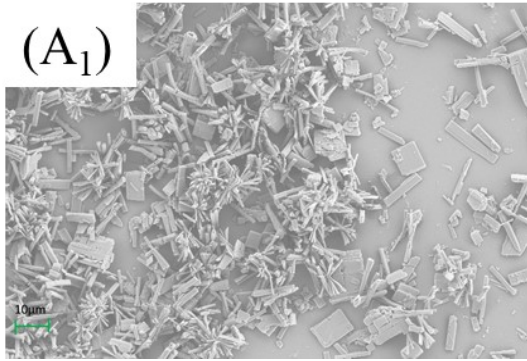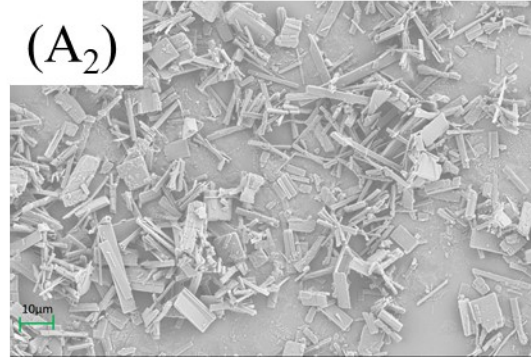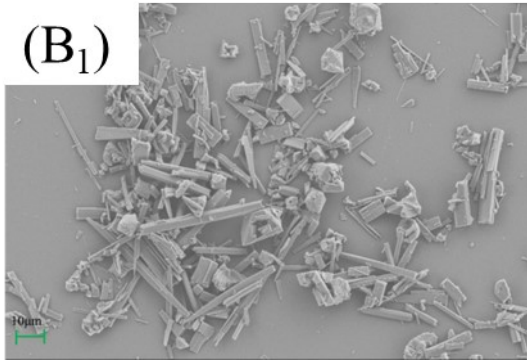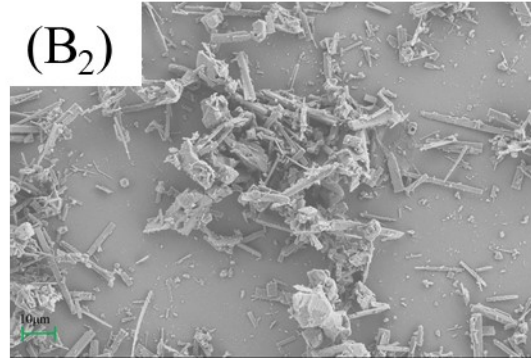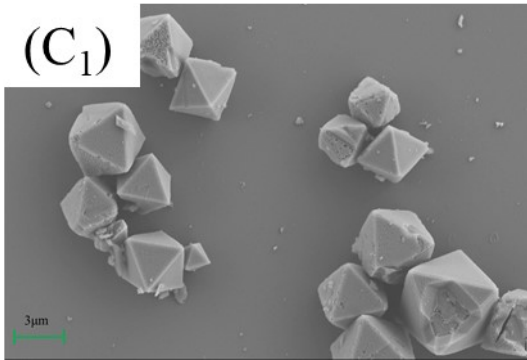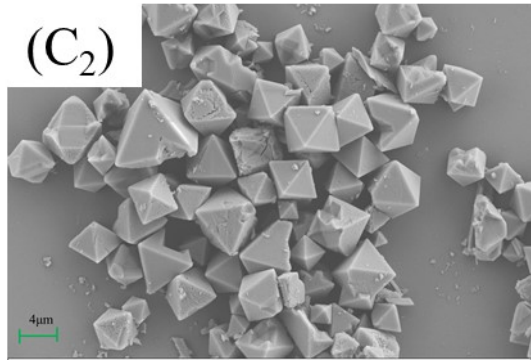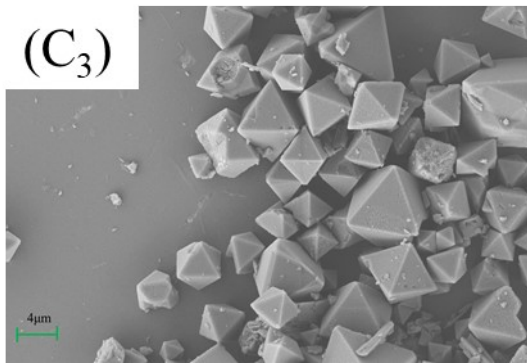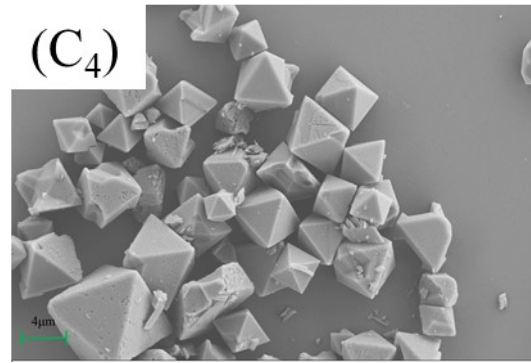

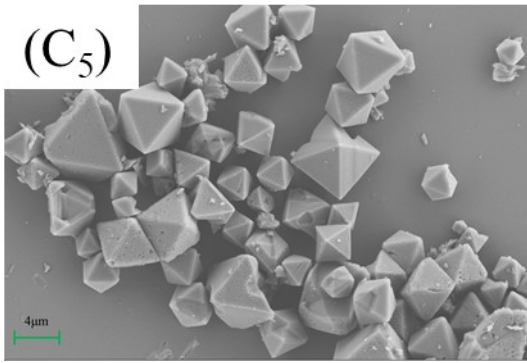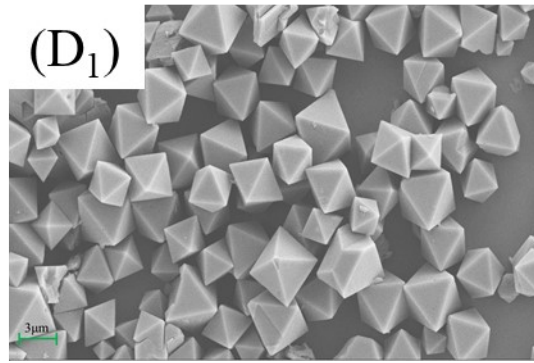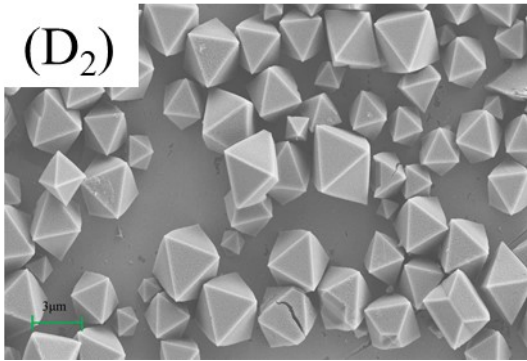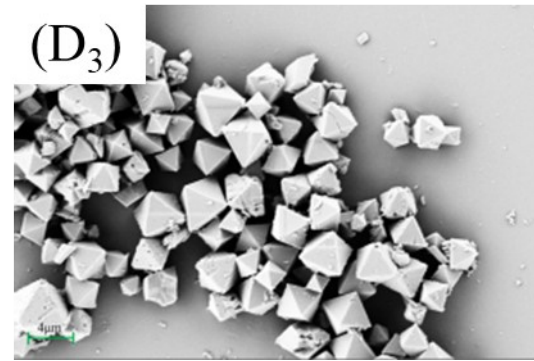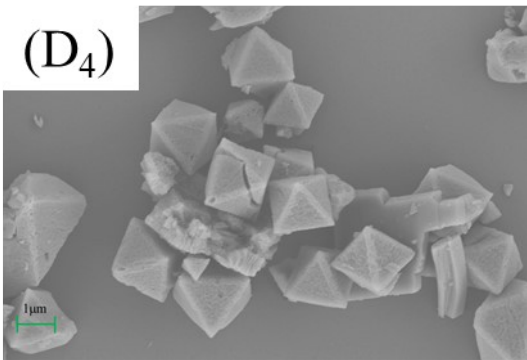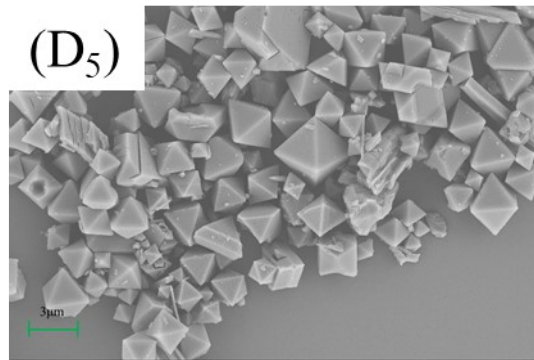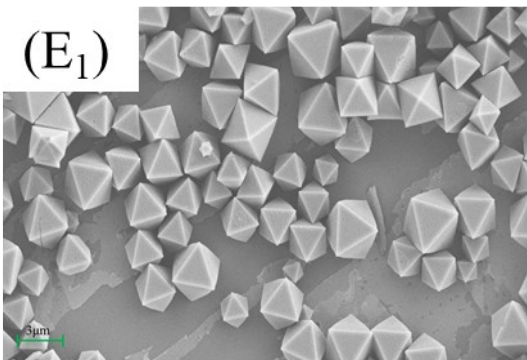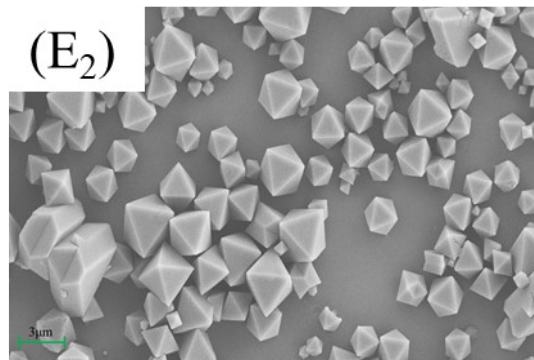

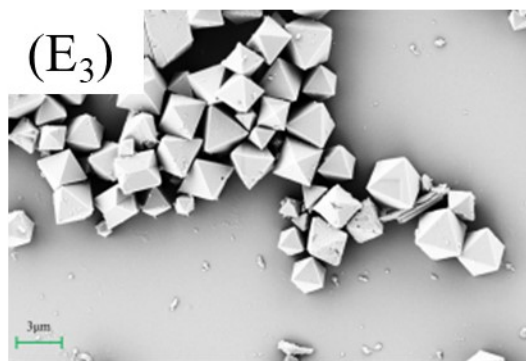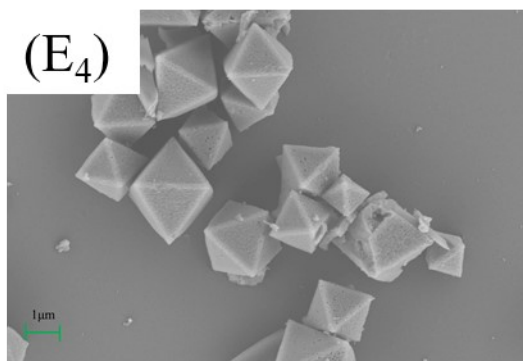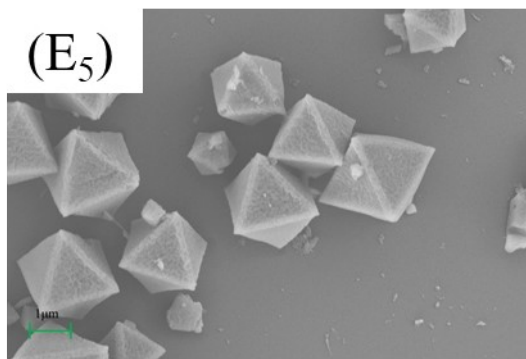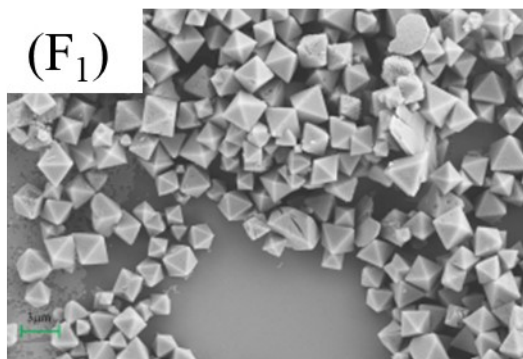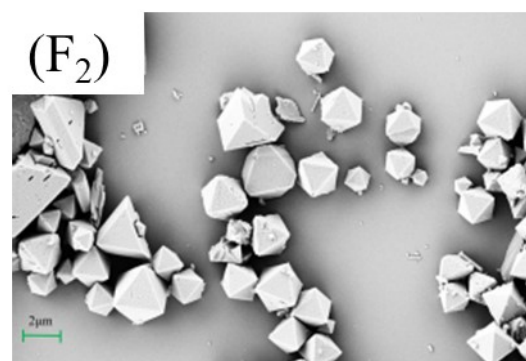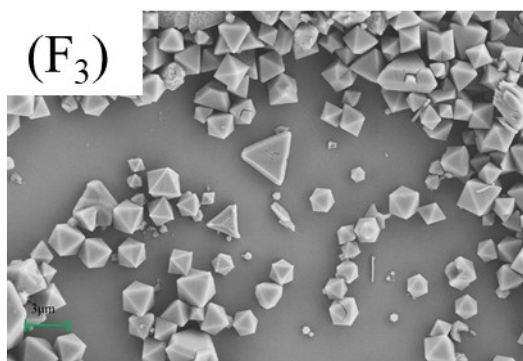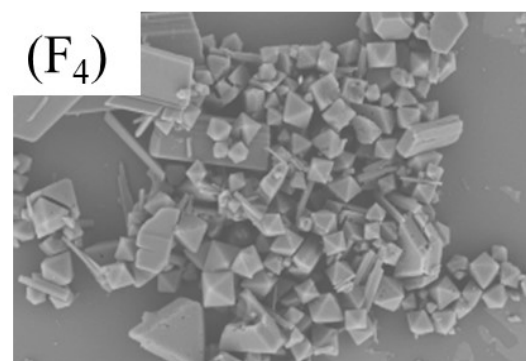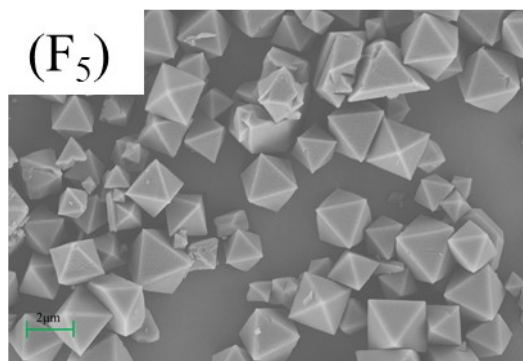

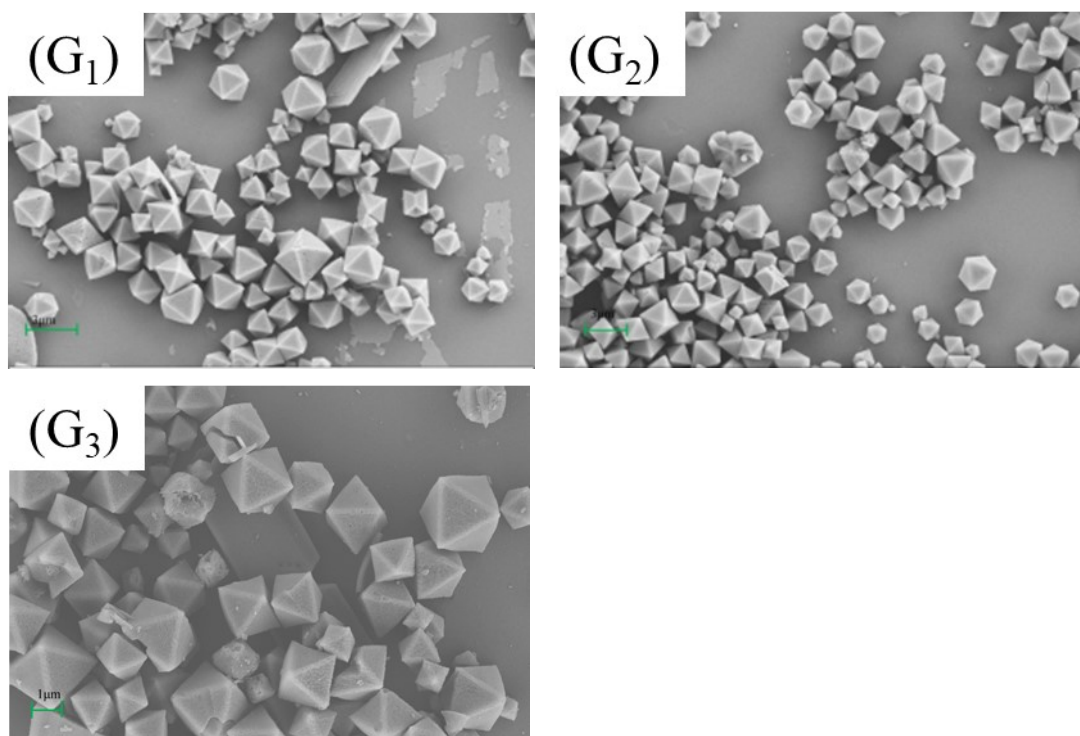

**Fig. S1.** SEM images of ((A<sub>1</sub>) and (A<sub>2</sub>)): Cu-BTC, ((B<sub>1</sub>) and (B<sub>2</sub>)): PVP5@Cu-BTC after being soaked accordingly in water for 5 and 7 days; ((C<sub>1</sub>), (C<sub>2</sub>), (C<sub>3</sub>), (C<sub>4</sub>) and (C<sub>5</sub>)): PVP50@Cu-BTC; ((D<sub>1</sub>), (D<sub>2</sub>), (D<sub>3</sub>), (D<sub>4</sub>) and (D<sub>5</sub>)): PVP250@Cu-BTC; ((E<sub>1</sub>), (E<sub>2</sub>), (E<sub>3</sub>), (E<sub>4</sub>) and (E<sub>5</sub>)): PVP500@Cu-BTC, ((F<sub>1</sub>), (F<sub>2</sub>), (F<sub>3</sub>), (F<sub>4</sub>) and (F<sub>5</sub>)): PVP750@Cu-BTC after being soaked in water for 3, 5, 7, 12 and 14 days; ((G<sub>1</sub>), (G<sub>2</sub>), and (G<sub>3</sub>)): PVP1000@Cu-BTC after being soaked accordingly in water for 5, 7 and 12 days.

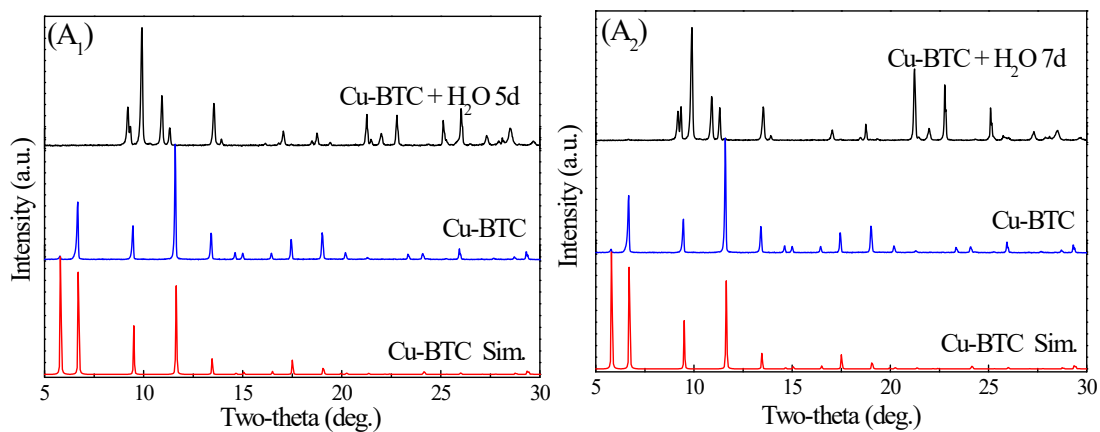

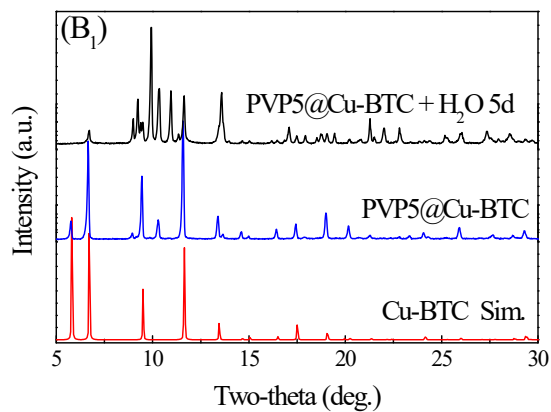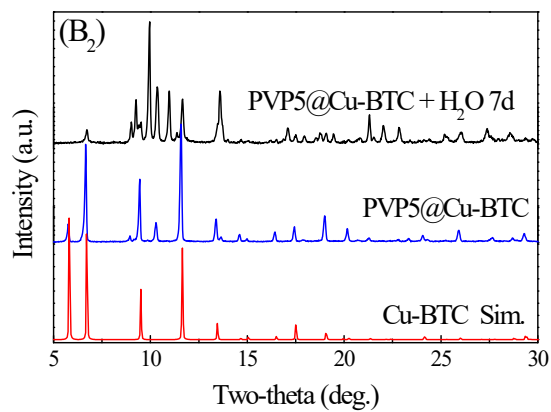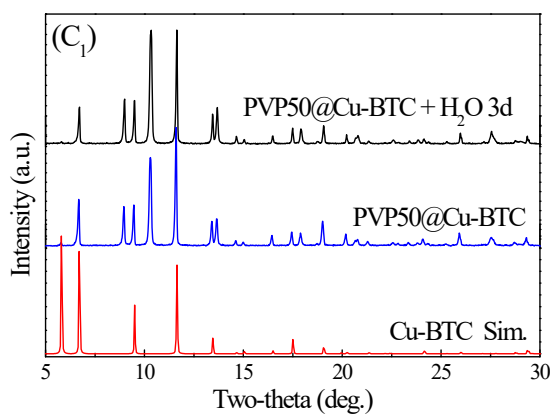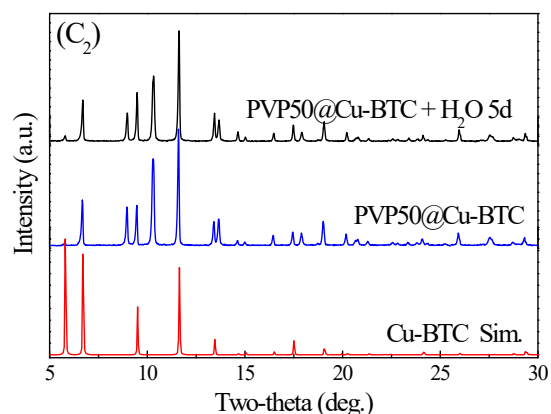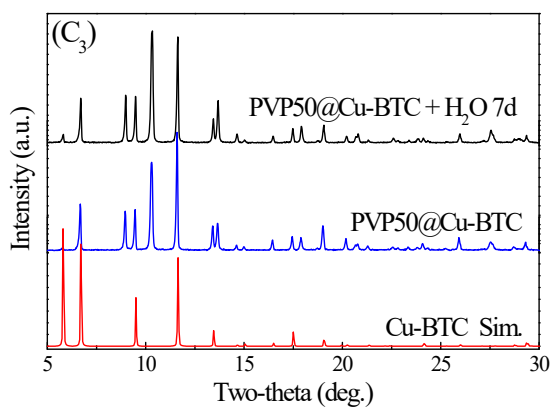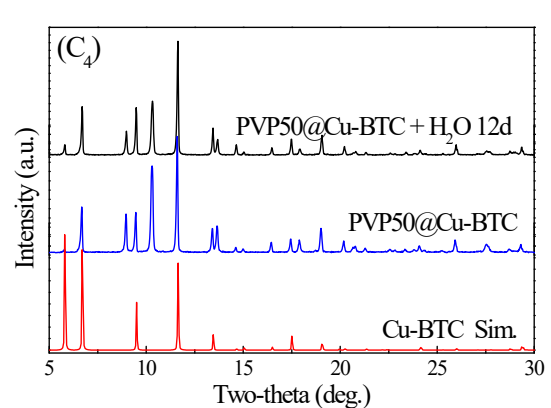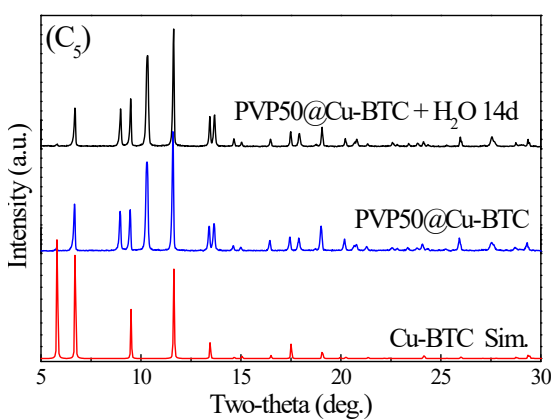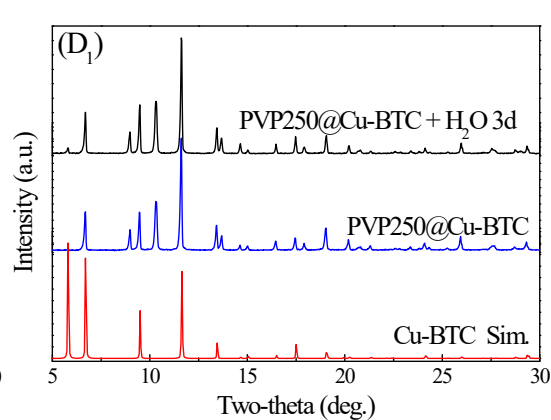

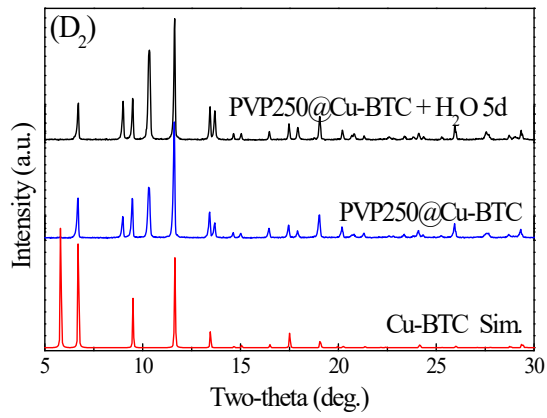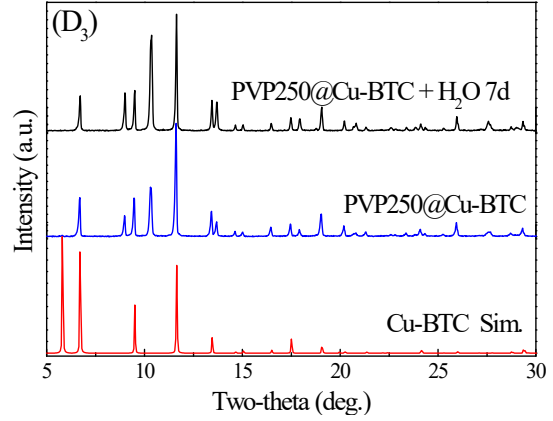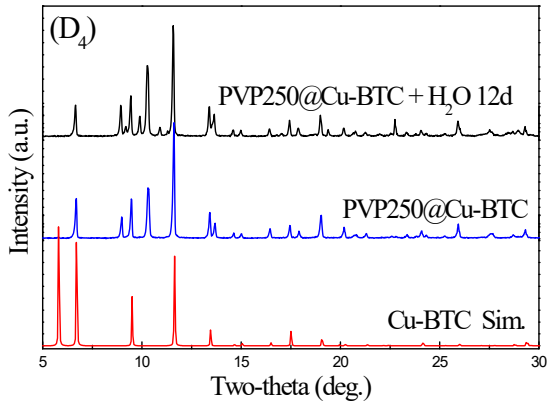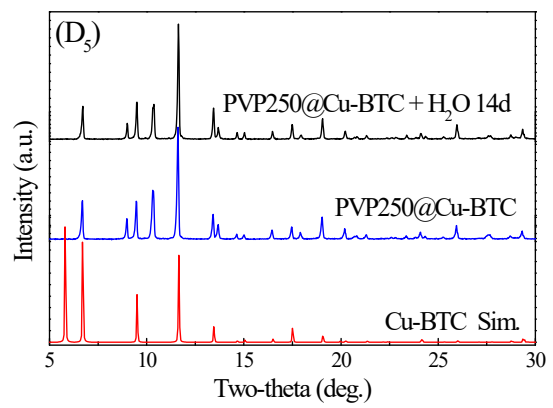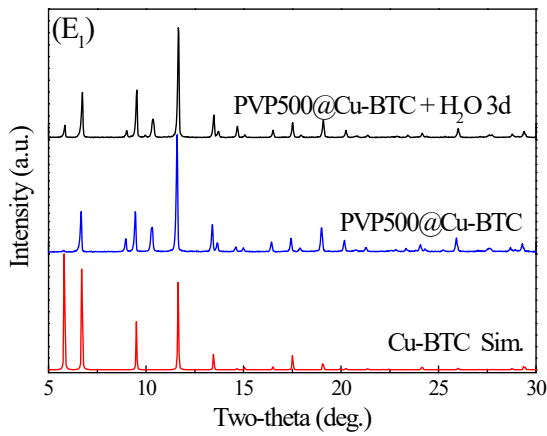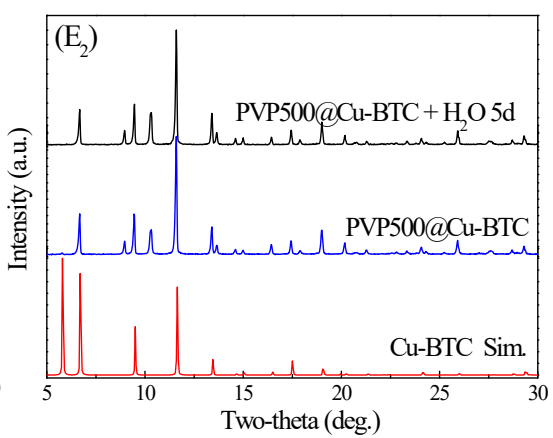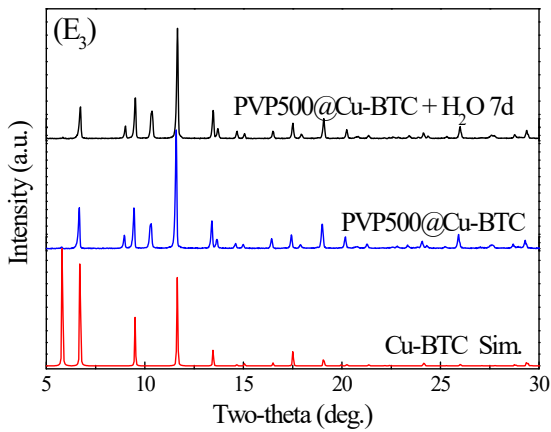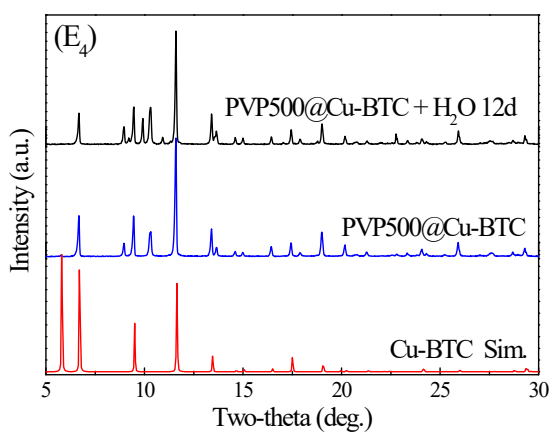



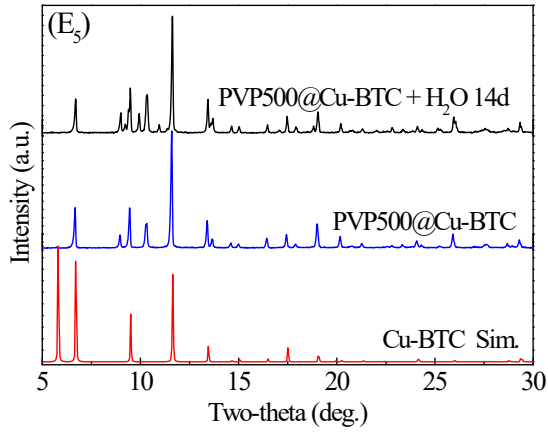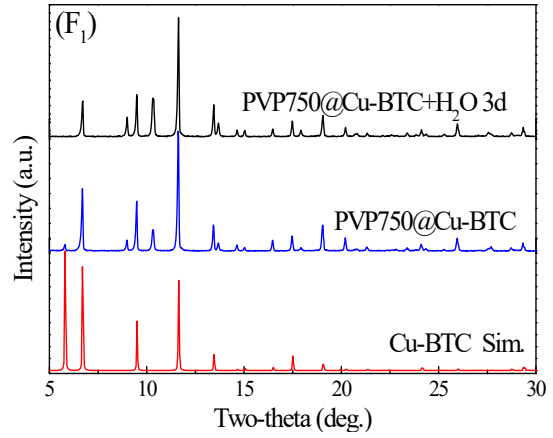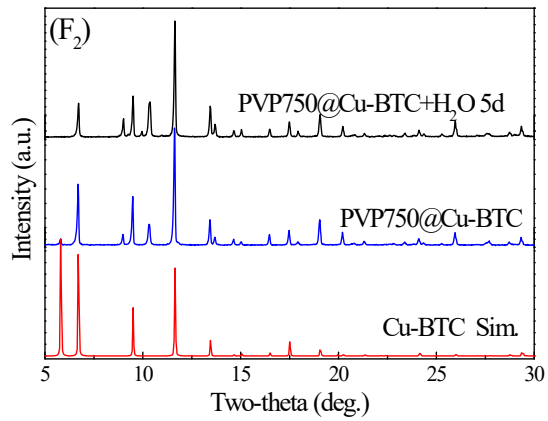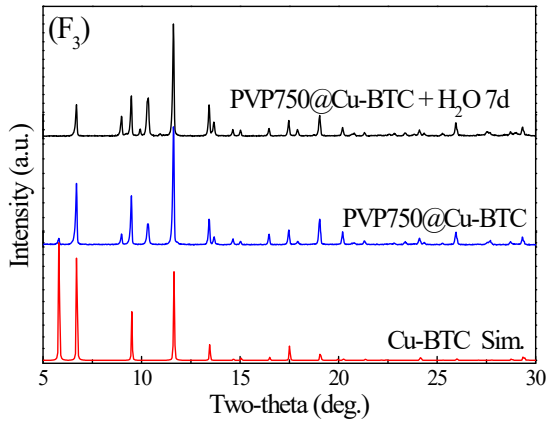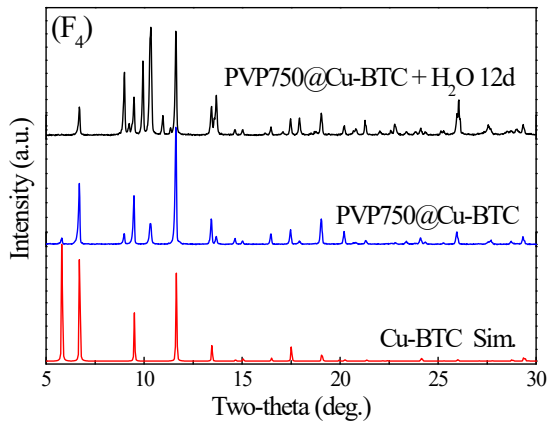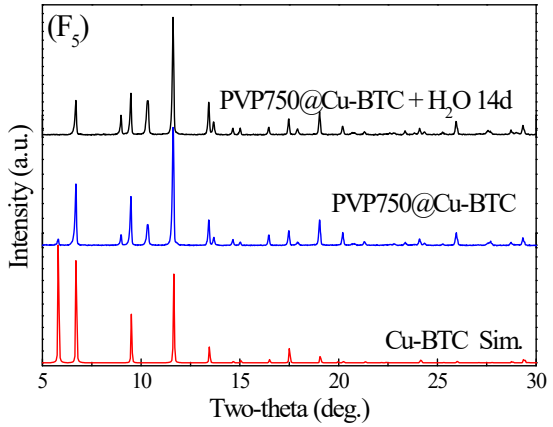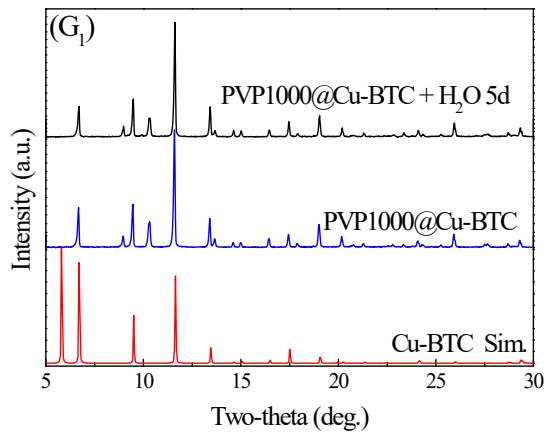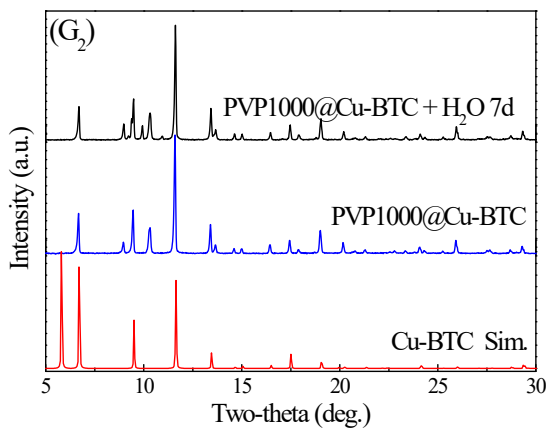

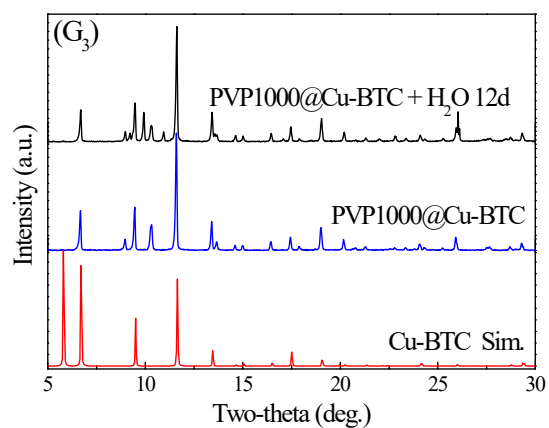

**Fig. S2.** XRD patterns of ((A<sub>1</sub>) and (A<sub>2</sub>)): Cu-BTC, ((B<sub>1</sub>) and (B<sub>2</sub>)): PVP5@Cu-BTC after being soaked accordingly in water for 5 and 7 days; ((C<sub>1</sub>), (C<sub>2</sub>), (C<sub>3</sub>), (C<sub>4</sub>) and (C<sub>5</sub>)): PVP50@Cu-BTC; ((D<sub>1</sub>), (D<sub>2</sub>), (D<sub>3</sub>), (D<sub>4</sub>) and (D<sub>5</sub>)): PVP250@Cu-BTC; ((E<sub>1</sub>), (E<sub>2</sub>), (E<sub>3</sub>), (E<sub>4</sub>) and (E<sub>5</sub>)): PVP500@Cu-BTC, ((F<sub>1</sub>), (F<sub>2</sub>), (F<sub>3</sub>), (F<sub>4</sub>) and (F<sub>5</sub>)): PVP750@Cu-BTC after being soaked in water for 3, 5, 7, 12 and 14 days; ((G<sub>1</sub>), (G<sub>2</sub>) and (G<sub>3</sub>)): PVP1000@Cu-BTC after being soaked accordingly in water for 5, 7 and 12 days.

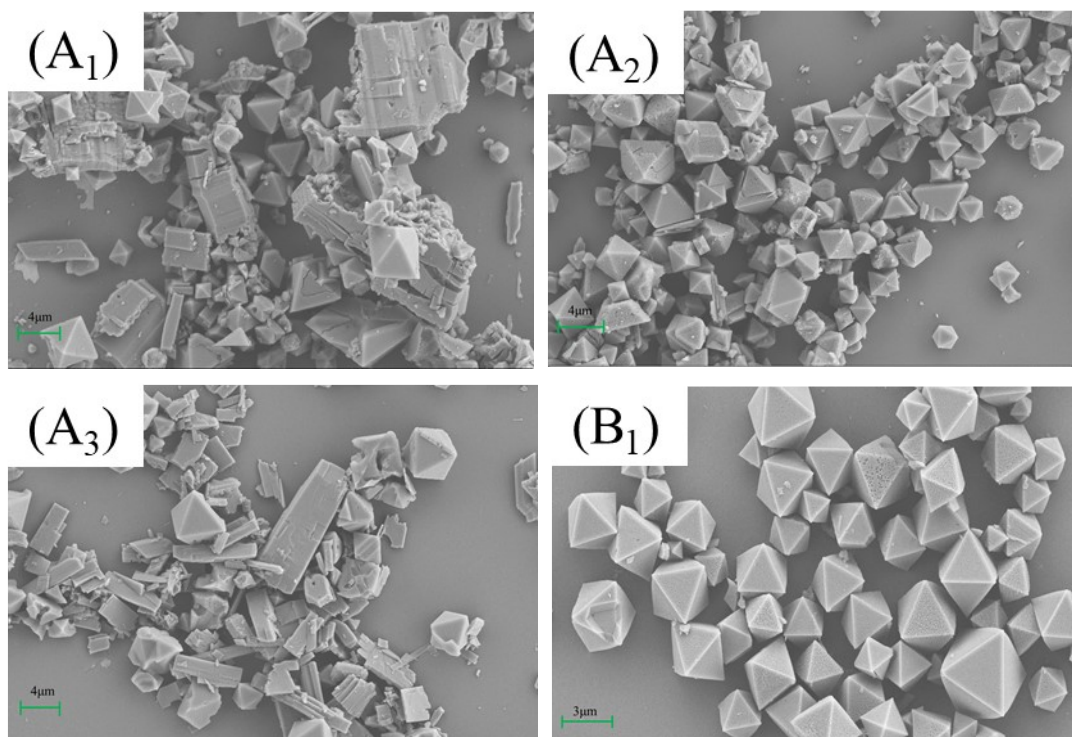

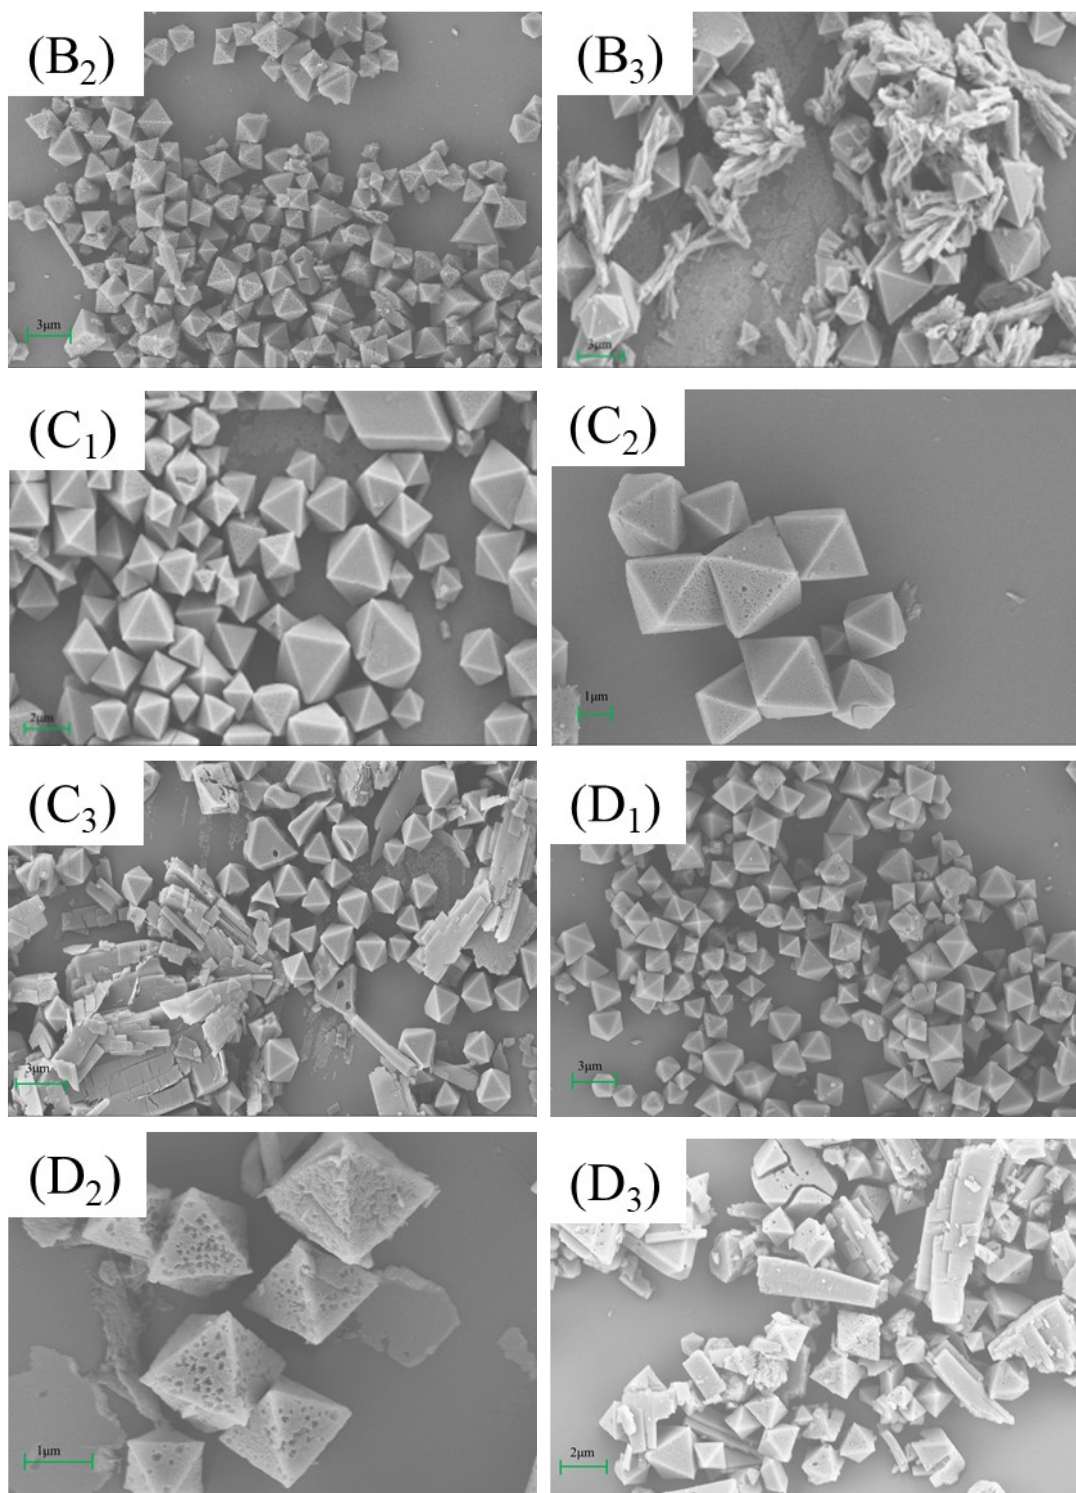

**Fig. S3.** SEM images of (A<sub>1</sub>), (A<sub>2</sub>) and (A<sub>3</sub>): PVP50@Cu-BTC; (B<sub>1</sub>), (B<sub>2</sub>) and (B<sub>3</sub>): PVP250@Cu-BTC; (C<sub>1</sub>), (C<sub>2</sub>) and (C<sub>3</sub>): PVP500@Cu-BTC; (D<sub>1</sub>), (D<sub>2</sub>) and (D<sub>3</sub>): PVP750@Cu-BTC being soaked accordingly in aqueous solutions at pH=2, 8 and 12 for 30 min.

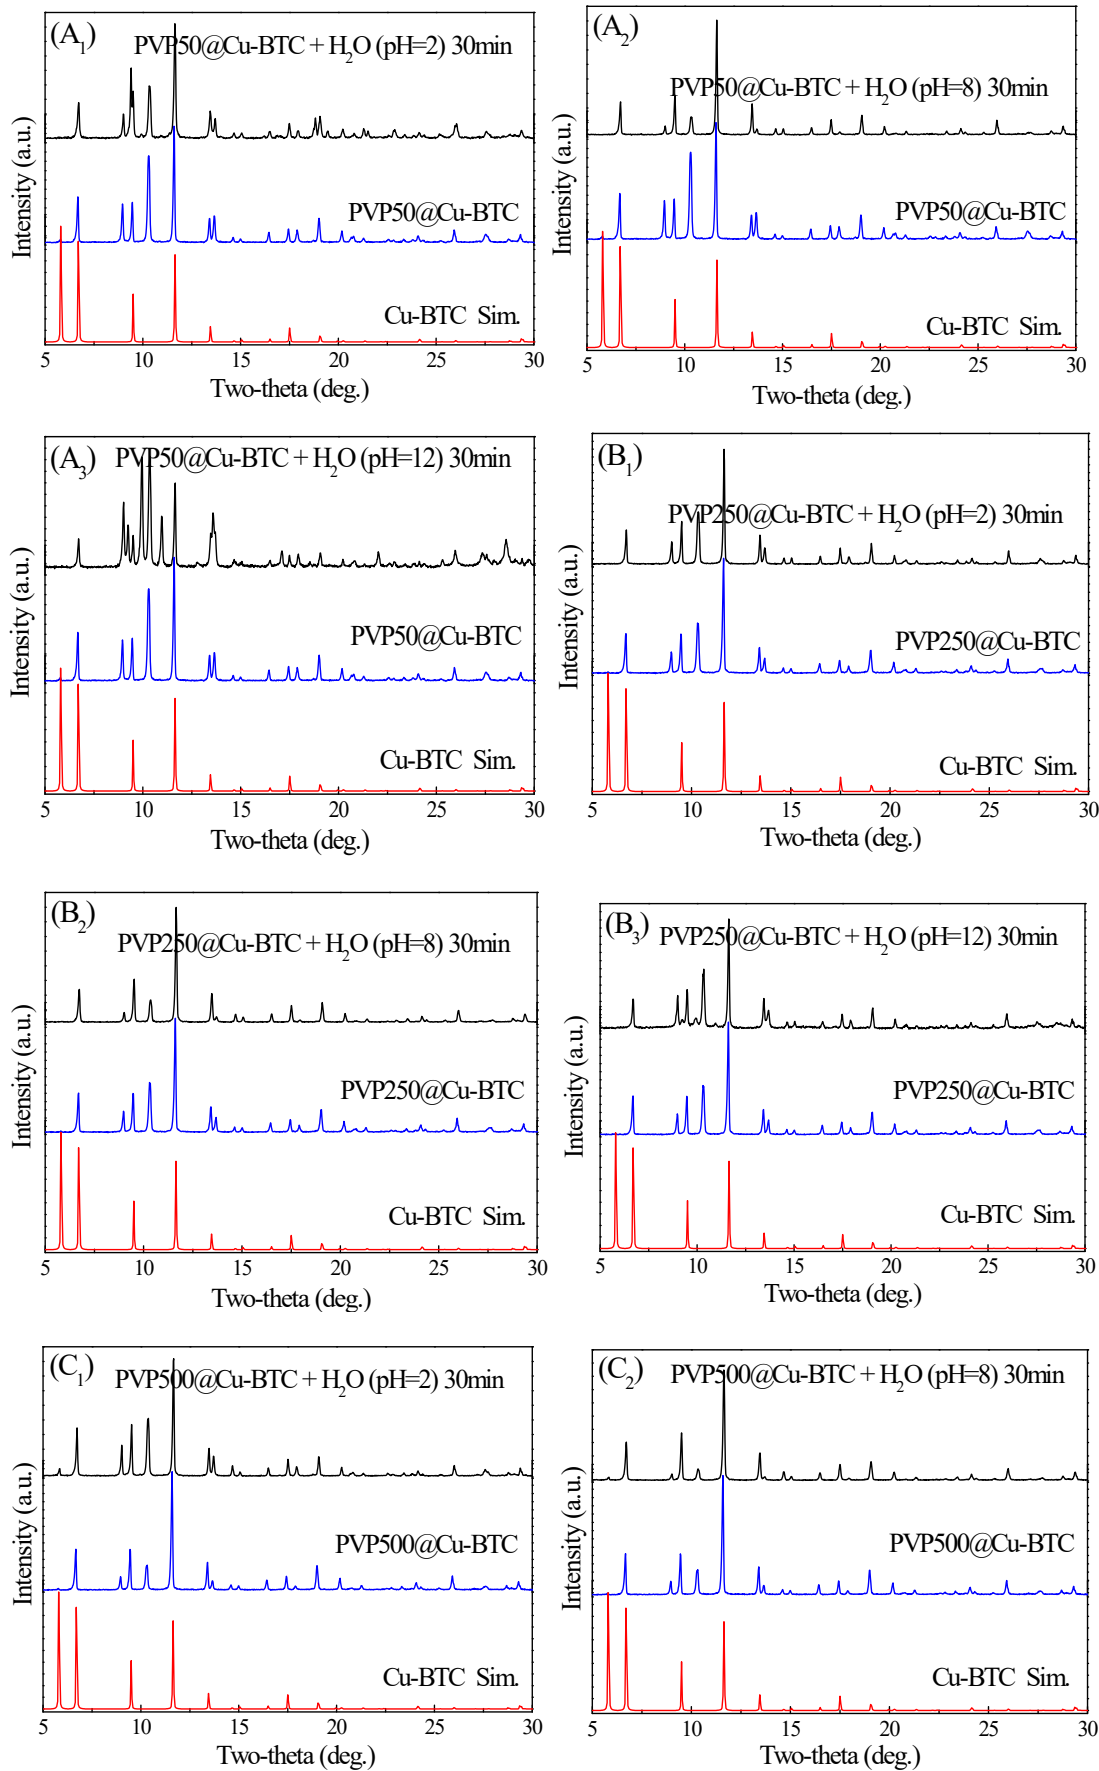

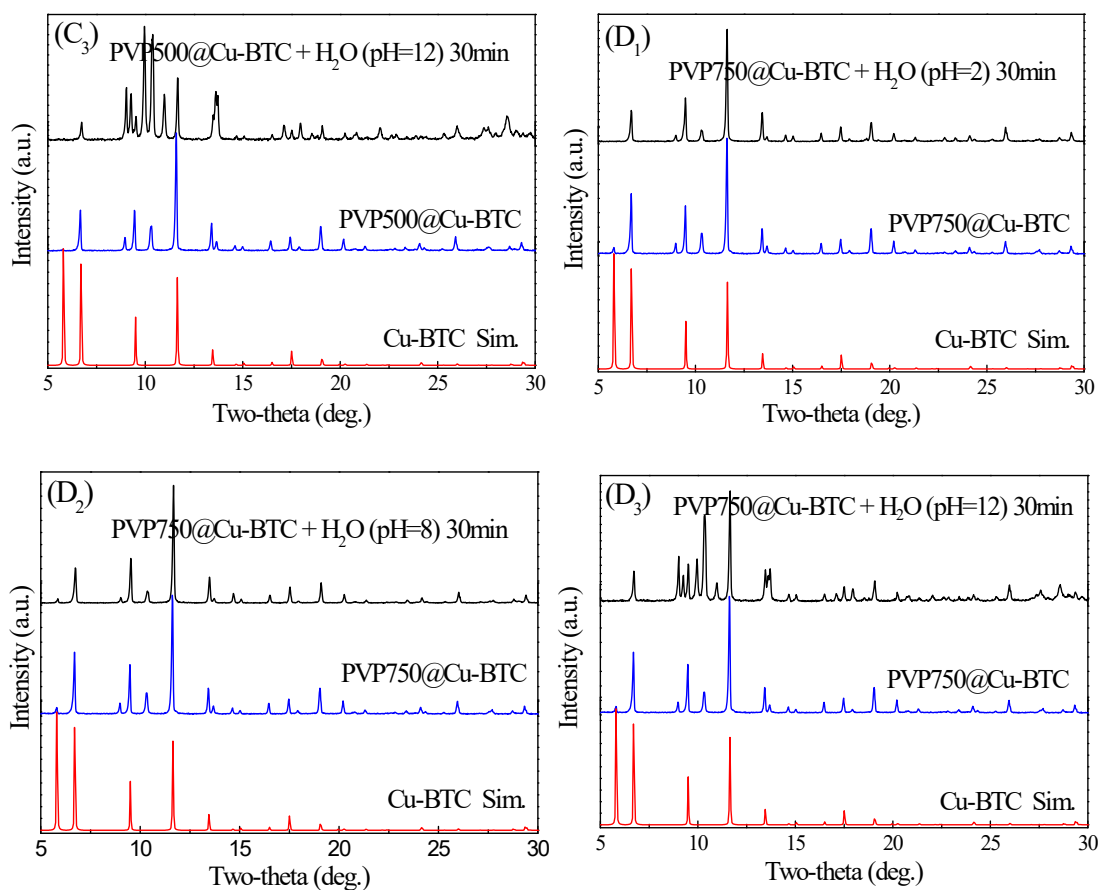

**Fig. S4.** XRD patterns of (A<sub>1</sub>), (A<sub>2</sub>) and (A<sub>3</sub>): PVP50@Cu-BTC; (B<sub>1</sub>), (B<sub>2</sub>) and (B<sub>3</sub>): PVP250@Cu-BTC; (C<sub>1</sub>), (C<sub>2</sub>) and (C<sub>3</sub>): PVP500@Cu-BTC; (D<sub>1</sub>), (D<sub>2</sub>) and (D<sub>3</sub>): PVP750@Cu-BTC being soaked accordingly in aqueous solutions at pH=2, 8 and 12 for 30 min.

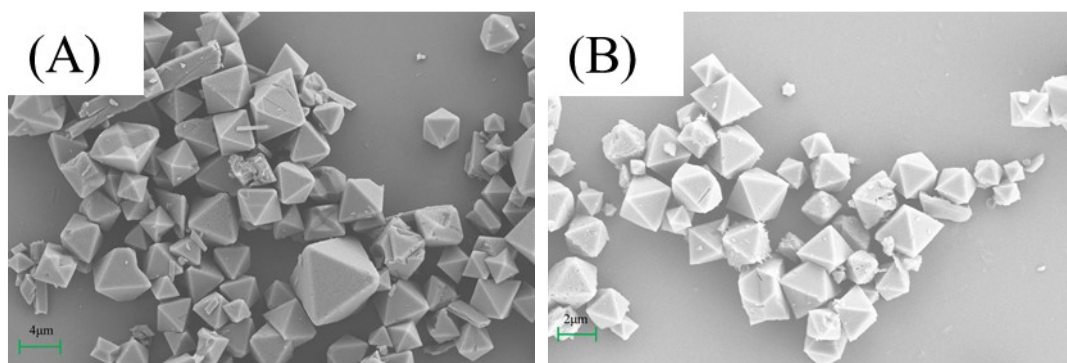

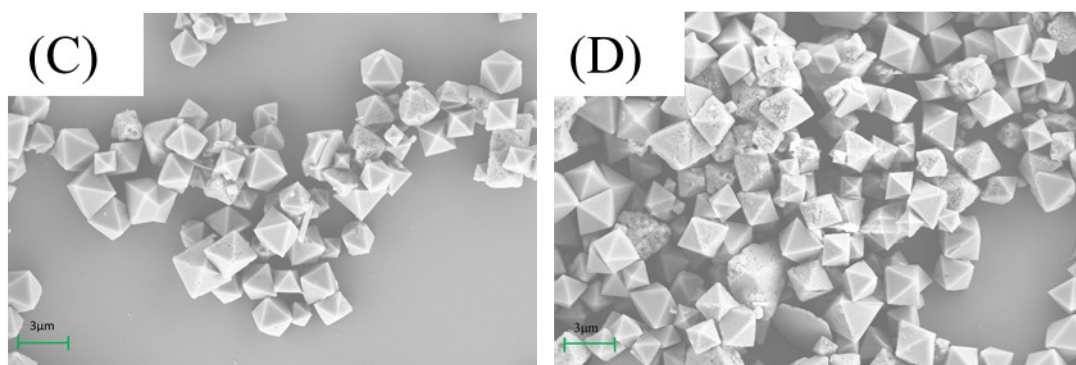

**Fig. S5.** SEM images of (A): PVP50@Cu-BTC, (B): PVP250@Cu-BTC, (C): PVP500@Cu-BTC, and (D): PVP750@Cu-BTC being soaked accordingly in water at 100 °C for 30 min.

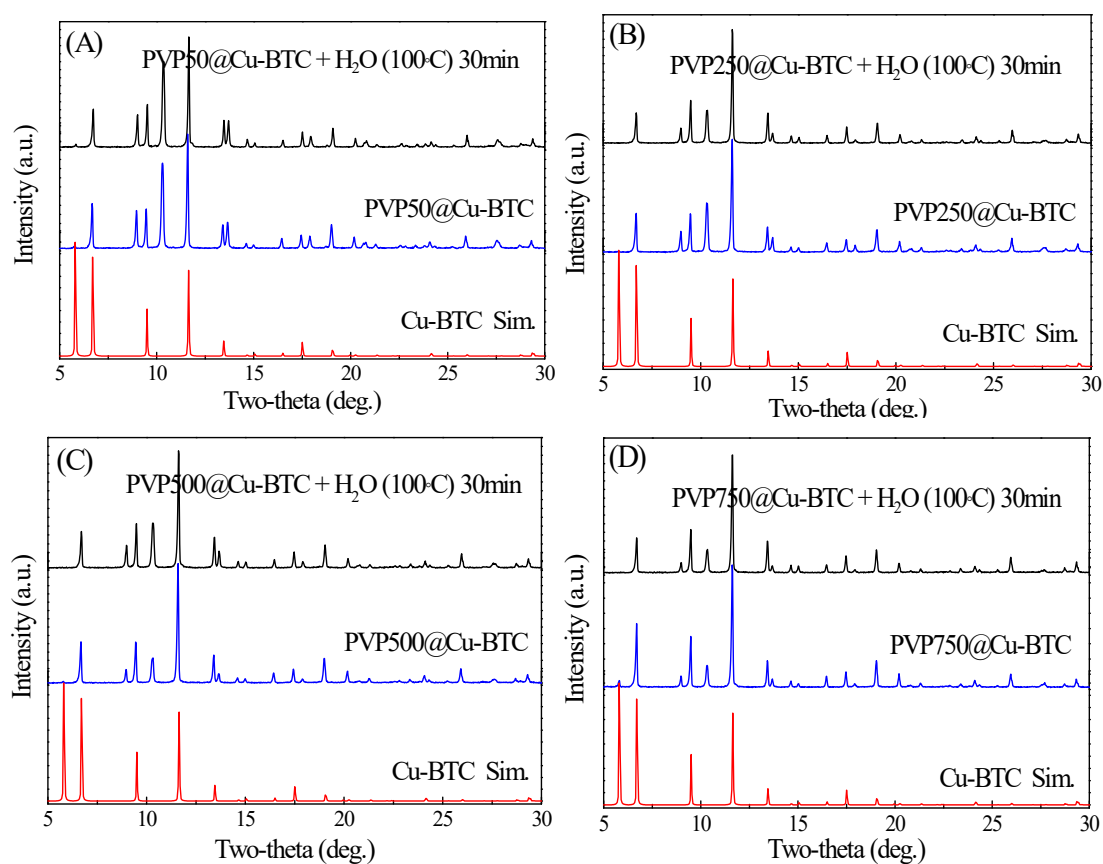

**Fig. S6.** XRD patterns of (A): PVP50@Cu-BTC, (B): PVP250@Cu-BTC, (C): PVP500@Cu-BTC, and (D): PVP750@Cu-BTC being soaked accordingly in water at 100 °C for 30 min.

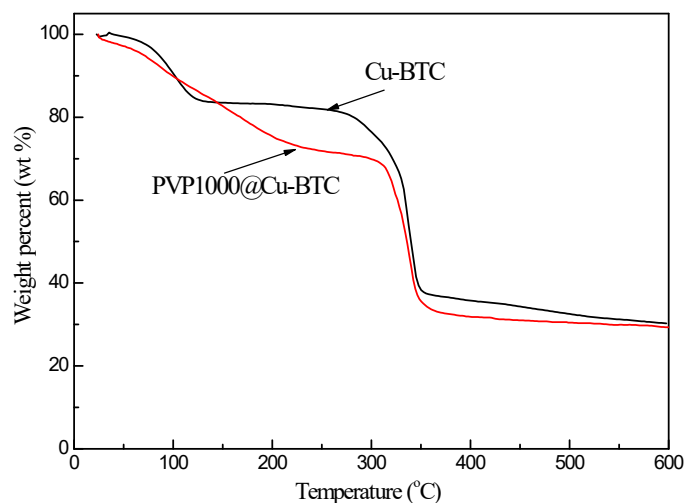

**Fig. S7.** TGA curves of Cu-BTC and PVP1000@Cu-BTC samples under nitrogen atmosphere.

**Table S1.** Summary of textural properties of the samples

| Samples             | $S_{\text{BET}}$<br>( $\text{m}^2 \cdot \text{g}^{-1}$ ) | Pore volume<br>( $\text{cm}^3 \cdot \text{g}^{-1}$ ) | Average pore size<br>(nm) |
|---------------------|----------------------------------------------------------|------------------------------------------------------|---------------------------|
| Cu-BTC              | 970                                                      | 0.37                                                 | 0.57                      |
| PVP(0.00005)@Cu-BTC | 1669                                                     | 0.67                                                 | 0.75                      |
| PVP(0.0005)@Cu-BTC  | 1166                                                     | 0.47                                                 | 0.52                      |
| PVP(0.0025)@Cu-BTC  | 1003                                                     | 0.42                                                 | 0.51                      |
| PVP(0.005)@Cu-BTC   | 1187                                                     | 0.46                                                 | 0.52                      |
| PVP(0.0075)@Cu-BTC  | 1306                                                     | 0.49                                                 | 0.55                      |
| PVP(0.01)@Cu-BTC    | 1162                                                     | 0.44                                                 | 0.61                      |

**Table S2.** Comparison of the MB uptake capacity over different adsorbents

| Adsorbent                             | MB uptake capacity ( $\mu\text{mol/g}$ ) | Reference |
|---------------------------------------|------------------------------------------|-----------|
| PVP750@Cu-BTC                         | 240                                      | this work |
| PVP1000@Cu-BTC                        | 271                                      | this work |
| M-Cu-BTC                              | 1                                        | 1         |
| MWCNT                                 | 184                                      | 2         |
| MIL-101-Cr                            | 63                                       | 3         |
| MIL-53(Al)                            | 63                                       | 4         |
| Cu-BTC                                | 28                                       | 5         |
| Cu-BTC/GO                             | 45                                       | 5         |
| Fe <sub>3</sub> O <sub>4</sub> @ZIF-8 | 63                                       | 6         |
| Co doped Fe-BDC                       | 75                                       | 7         |
| MOF                                   |                                          |           |
| Pine leaves                           | 396                                      | 8         |
| Citric Acid Modified                  |                                          |           |
| Sawdust                               | 348                                      | 9         |
| Ce-UiO-66                             | 344                                      | 10        |

## References

- 1 A. R. Abbasi, M. Karimi and K. Daasbjerg, *Ultrason. Sonochem.*, 2017, **37**, 182–191.
- 2 S. B. Wang, C. W. Ng, W. T. Wang, Q. Li and Z. P. Hao, *Chem. Eng. J.*, 2012, **197**, 34–40.
- 3 T. T. Shen, J. M. Luo, S. Y. Zhang and X. B. Luo, *J. Environ. Chem. Eng.*, 2015, **3**, 1372–1383.
- 4 C. Li, Z. H. Xiong, J. M. Zhang and C. S. Wu, *J. Chem. Eng. Data*, 2015, **60**, 3414–



3422.

5 L. Li, X. L. Liu, H. Y. Geng, B. Hu, G. W. Song and Z. S. Xu, *J. Mater. Chem. A.*, 2013, **1**, 10292.

6 J. Zheng, C. Cheng, W. J. Fang, C. Chen, R. W. Yan, H. X. Huai and C. C. Wang, *Cryst. Eng. Comm.*, 2014, **16**, 3960–3964.

7 S. Soni, P. K. Bajpai, J. Mittal and C. Arora, *J. Mol. Liq.*, 2020, **314**, 113642.

8 M. T. Yagub, T. K. Sen and H. M. Ang, *Water, Air, Soil Pollut.*, 2012, **223**, 5267–5282.

9 W. Zou, H. B. S. Gao and K. Li, *Korean J. Chem. Eng.*, 2013, **30**, 111–122.

10 R. M. Rego, G. Sriram, K. V. Ajeya, H. Y. Jung, M. D. Kurkuri and M. Kigga, *Journal of Hazard. Mater.*, 2021, **416**, 125941.
